# Supplementary material for: Cohort profile: The Cancer Risk Associated with the Body Art of Tattooing (CRABAT) study
Source: bioRxiv or medRxiv preprint supplement (doi:10.1101/2024.10.28.24316120), 2024-11-01

## Supplementary material

TableS1: Additional data on lifestyle factors, environmental risk factors and medical conditions available from the Constances variable pool and available in CRABAT.

| Variables category                        | Variables name                    | Baseline | Follow up |
|-------------------------------------------|-----------------------------------|----------|-----------|
| <b>Lifestyle and health</b>               |                                   |          |           |
| General health                            |                                   |          | 2022      |
|                                           | Physical health                   |          | 2014      |
|                                           | Mental health                     |          | 2014      |
| Physical activities                       |                                   |          | 2022      |
|                                           | at work                           |          |           |
|                                           | off work                          |          |           |
| Home and quality of life                  |                                   |          |           |
|                                           | Nationality                       |          |           |
|                                           | Education level                   |          |           |
|                                           | Marital status                    |          |           |
|                                           | Income                            |          |           |
| Sex life                                  |                                   | Baseline |           |
|                                           | Number of partners                |          |           |
|                                           | Sexual orientation                |          |           |
|                                           | Use protection                    |          |           |
| Smoking                                   |                                   |          | 2022      |
|                                           | Lifetime tobacco smoking status   |          |           |
|                                           | Pack-year                         |          |           |
| Electronic cigarette                      |                                   |          |           |
|                                           | Lifetime smoking status           |          | 2022      |
|                                           | Current smoker                    |          |           |
|                                           | Nicotine consumption level        |          |           |
| Cannabis consumption                      |                                   |          | 2022      |
|                                           | Lifetime consumption status       |          |           |
|                                           | Current consumption               |          |           |
| Alcohol consumption                       |                                   |          |           |
|                                           | Lifetime consumption status       |          | 2022      |
|                                           | Level of consumption              |          |           |
| <b>Females health</b>                     |                                   | Baseline |           |
|                                           | Pregnancies (N)                   |          |           |
|                                           | Date of last pregnancy            |          |           |
|                                           | ectopic pregnancy (N)             |          |           |
|                                           | Miscarriages (N)                  |          |           |
|                                           | Therapeutic abortions (N)         |          |           |
|                                           | Childs (N)                        |          |           |
|                                           | Contraception type                |          | 2016      |
| <b>Occupational history</b>               |                                   |          |           |
|                                           | Status of employment              |          | 2019      |
|                                           | Current socio-professional status |          | 2019      |
| Occupational exposures                    |                                   |          |           |
|                                           | Night shift                       |          | 2019      |
| Exposure to solvents/ diluent/ detergents |                                   | Baseline |           |
|                                           | Diesel engine exhaust             |          |           |
|                                           | Petrol                            |          |           |
|                                           | Trichloroethylene                 |          |           |
|                                           | White spirit                      |          |           |
|                                           | Cellulose diluent                 |          |           |
|                                           | Formaldehyde                      |          |           |
| Exposure to fumes                         |                                   | Baseline |           |
|                                           | fumes                             |          |           |
|                                           | Plastic/ rubber fumes             |          |           |
|                                           | Biomass fumes Welding             |          |           |
| Exposure to dusts                         |                                   | Baseline |           |
| <i>Construction dusts</i>                 |                                   |          |           |
|                                           | Asbestos                          |          |           |
|                                           | Cement                            |          |           |
|                                           | No-slung concrete dust            |          |           |

|                                |                                       |          |      |
|--------------------------------|---------------------------------------|----------|------|
| Metal dust                     |                                       | Baseline |      |
|                                | Iron                                  |          |      |
|                                | Stainless steel                       |          |      |
|                                | Copper                                |          |      |
| Other dusts                    |                                       | Baseline |      |
|                                | Plastic/ rubber                       |          |      |
|                                | Coal                                  |          |      |
|                                | Wood                                  |          |      |
|                                | Textile                               |          |      |
| Fuel                           |                                       | Baseline |      |
|                                | Disel oil                             |          |      |
|                                | Petrol                                |          |      |
| Other chemical exposure        |                                       |          |      |
|                                | Pesticide/ insecticide/ fungicide     |          |      |
|                                | Fertilizers                           |          |      |
|                                | Glass wood                            |          |      |
|                                | Insulation material                   |          |      |
|                                | Paint/ varnish                        |          |      |
|                                | Ink/ stains                           |          |      |
|                                | Radiation exposure                    |          |      |
|                                | Artificial UV radiation               |          |      |
|                                | Outdoor work (hr/day)                 |          |      |
| <i>Biological exposure</i>     |                                       | Baseline |      |
|                                | Micro-organism/ parasites/<br>viruses |          |      |
| <b>Medical background</b>      |                                       |          | 2022 |
| Cardiovascular disease         |                                       |          |      |
| Digestive disease              |                                       |          |      |
|                                | Hepatitis B                           |          |      |
|                                | Hepatitis C                           |          |      |
|                                | Other type of hepatitis               |          |      |
| Neurological and mental health |                                       |          | 2022 |
|                                | Depression                            |          |      |
|                                | Suicide attempts                      |          |      |
| Osteoarticular disorders       |                                       |          |      |
|                                | Inflammation arthritis                |          |      |
|                                |                                       |          |      |
| Cancer history                 |                                       |          |      |
| Biometry                       |                                       |          |      |
|                                |                                       |          |      |
|                                | Body Mass Index                       |          | 2022 |
|                                | Hip measure                           |          |      |
| Prothesis (N)                  |                                       |          | 2022 |

Supplementary figure 1: study flowchart

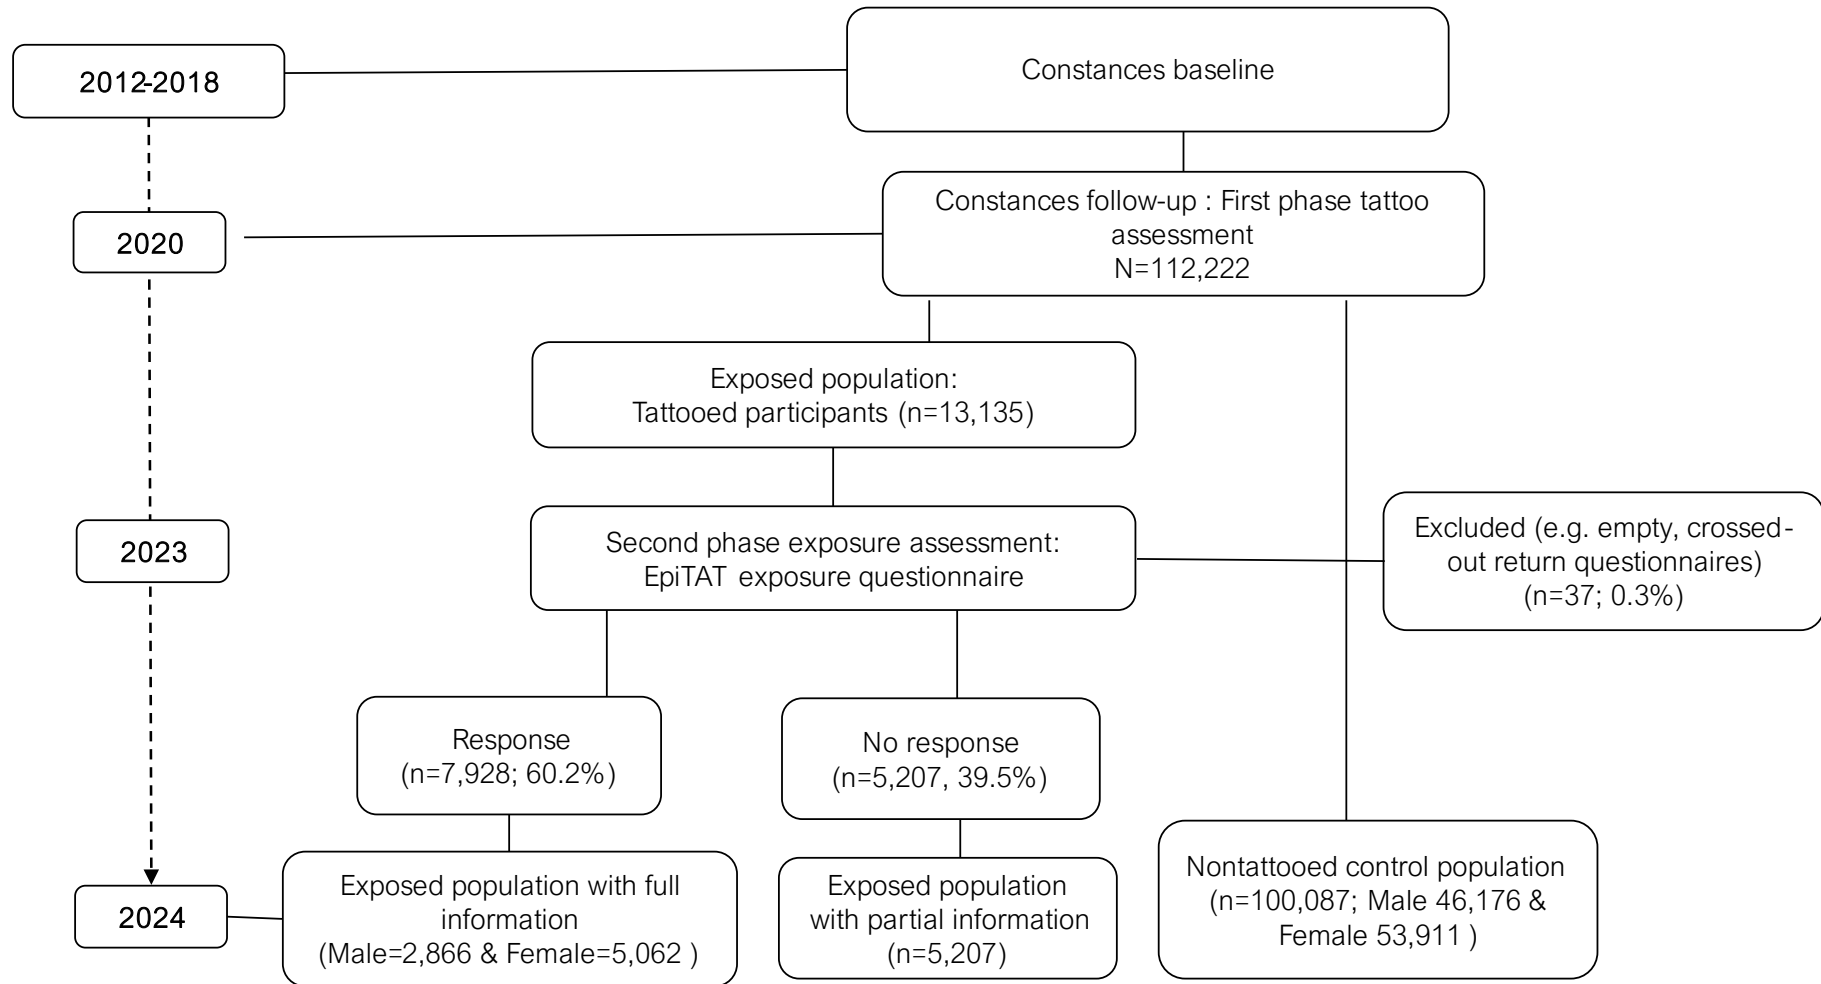

Supplement: Supplementary file [file media-1.pdf]
